# Supplementary material
Source: MDPI journal article supplement (https://www.mdpi.com/1999-4907/14/7/1331)
Supplement: s1 [file s1]

**Table S1. Information on the place of study.**

| Site    | Longitude   | Latitude      | altitude | aspect | slope | parent rock | Soil Type         |
|---------|-------------|---------------|----------|--------|-------|-------------|-------------------|
| IM-3-1  | 31° 27' 55" | 115° 22' 48"  | 813      | NE     | 24.5  | granite     | yellow-brown loam |
| IM 3-2  | 31° 27' 55" | 115° 22' 54"  | 821      | NE     | 25.2  | granite     | yellow-brown loam |
| IM 3-3  | 31° 27' 58" | 115° 22' 46"  | 785      | NE     | 26.4  | granite     | yellow-brown loam |
| IM 3-4  | 31° 27' 58" | 115° 22' 41"  | 770      | NE     | 21.2  | granite     | yellow-brown loam |
| IM 3-5  | 31° 28' 4"  | 115° 22' 51"  | 735      | NE     | 21.4  | granite     | yellow-brown loam |
| IM 8-1  | 31° 28' 8"  | 115° 22' 48"  | 750      | N      | 27.5  | granite     | yellow-brown loam |
| IM 8-2  | 31° 28' 6"  | 115° 22' 43"  | 779      | NW     | 28.6  | granite     | yellow-brown loam |
| IM 8-3  | 31° 28' 2"  | 115° 22' 44"  | 786      | NW     | 27.3  | granite     | yellow-brown loam |
| IM 8-4  | 31° 28' 4"  | 115° 22' 49." | 787      | NW     | 25.7  | granite     | yellow-brown loam |
| IM 8-5  | 31° 28' 3"  | 115° 22' 46"  | 796      | NW     | 24.4  | granite     | yellow-brown loam |
| IM 15-1 | 31° 28' 17" | 115° 22' 35." | 729      | NE     | 28.6  | granite     | yellow-brown loam |
| IM 15-2 | 31° 28' 19" | 115° 22' 38"  | 741      | NE     | 27.2  | granite     | yellow-brown loam |
| IM 15-3 | 31° 28' 33" | 115° 22' 37"  | 738      | NE     | 27.4  | granite     | yellow-brown loam |
| IM 15-4 | 31° 28' 16" | 115° 22' 31." | 762      | NE     | 26.5  | granite     | yellow-brown loam |
| IM 15-5 | 31° 28' 18" | 115° 22' 33"  | 726      | NE     | 25.3  | granite     | yellow-brown loam |
| IM 20-1 | 31° 29' 41" | 115° 22' 48"  | 584      | N      | 29.3  | granite     | yellow-brown loam |
| IM 20-2 | 31° 29' 41" | 115° 22' 53"  | 589      | N      | 28.4  | granite     | yellow-brown loam |
| IM 20-3 | 31° 29' 37" | 115° 22' 47"  | 604      | N      | 29.5  | granite     | yellow-brown loam |
| IM 20-4 | 31° 29' 41" | 115° 22' 44"  | 568      | NW     | 28.8  | granite     | yellow-brown loam |
| IM 20-5 | 31° 29' 41" | 115° 22' 49"  | 580      | NW     | 28.5  | granite     | yellow-brown loam |
| EM-3-1  | 31° 15' 22" | 115° 50' 32"  | 785      | N      | 24.6  | granite     | yellow-brown loam |
| EM-3-2  | 31° 15' 21" | 115° 50' 31"  | 821      | N      | 25.2  | granite     | yellow-brown loam |
| EM-3-3  | 31° 15' 21" | 115° 50' 27"  | 790      | N      | 20.5  | granite     | yellow-brown loam |

|         |              |              |     |    |      |         |                   |
|---------|--------------|--------------|-----|----|------|---------|-------------------|
| EM-3-4  | 31° 15' 22"  | 115° 50' 28" | 827 | N  | 22.5 | granite | yellow-brown loam |
| EM-3-5  | 31° 15' 19"  | 115° 50' 28" | 788 | NW | 25.2 | granite | yellow-brown loam |
| EM-8-1  | 31° 15' 23"  | 115° 50' 28" | 796 | N  | 24.4 | granite | yellow-brown loam |
| EM-8-2  | 31° 15' 23"  | 115° 50' 27" | 804 | N  | 26.5 | granite | yellow-brown loam |
| EM-8-3  | 31° 15' 23"  | 115° 50' 26" | 865 | N  | 26.9 | granite | yellow-brown loam |
| EM-8-4  | 31° 15' 24"  | 115° 50' 26" | 847 | NE | 28.4 | granite | yellow-brown loam |
| EM-8-5  | 31° 15' 25"  | 115° 50' 25" | 841 | NE | 25.3 | granite | yellow-brown loam |
| EM-15-1 | 31° 15' 14"  | 115° 50' 59" | 716 | N  | 21.5 | granite | yellow-brown loam |
| EM-15-2 | 31° 15' 15"  | 115° 50' 60" | 713 | N  | 25.4 | granite | yellow-brown loam |
| EM-15-3 | 31° 15' 13"  | 115° 50' 58" | 723 | N  | 26.3 | granite | yellow-brown loam |
| EM-15-4 | 31° 15' 14"  | 115° 50' 57" | 726 | N  | 22.5 | granite | yellow-brown loam |
| EM-15-5 | 31° 15' 12"  | 115° 50' 56" | 746 | N  | 24.3 | granite | yellow-brown loam |
| EM-20-1 | 31° 15' 18"  | 115° 50' 53" | 717 | NE | 24.8 | granite | yellow-brown loam |
| EM-20-2 | 31° 15' 18"  | 115° 50' 52" | 725 | N  | 25.4 | granite | yellow-brown loam |
| EM-20-3 | 31° 15' 19"  | 115° 50' 53" | 723 | NE | 24.9 | granite | yellow-brown loam |
| EM-20-4 | 31° 15' 16"  | 115° 50' 53" | 726 | NE | 25.3 | granite | yellow-brown loam |
| EM-20-5 | 31° 15' 15"  | 115° 50' 50" | 746 | NE | 25.7 | granite | yellow-brown loam |
| CK-1    | 31° 15' 14"  | 115° 51' 2"  | 714 | NE | 28.3 | granite | yellow-brown loam |
| CK-2    | 31° 15' 14"  | 115° 51' 3"  | 719 | NE | 28.5 | granite | yellow-brown loam |
| CK-3    | 31° 15' 12"  | 115° 51' 2"  | 747 | NE | 24.2 | granite | yellow-brown loam |
| CK-4    | 31° 15' 13"  | 115° 51' 3"  | 767 | N  | 21.8 | granite | yellow-brown loam |
| CK-5    | 31° 15' 12." | 115° 51' 4"  | 756 | N  | 20.2 | granite | yellow-brown loam |

Note: EM-3, EM-8, EM-15, EM-20, IM-3, IM-8, IM-15, IM-20, and CK, respectively, represent three years of extensive management, eight years of extensive management, 15 years of extensive management, 20 years of intensive management, three years of intensive management, eight years of intensive management, 15 years of intensive management, 20 years of intensive management, and no management. N, NE, and NW represent north, northeast, and northwest, respectively

**Table S2.** Comparison of species composition of various forest layers under different management intensities and durations.

| Pairs          | Tree  |         | Shrub |         | Herb  |         |
|----------------|-------|---------|-------|---------|-------|---------|
|                | R2    | p-Value | R2    | p-Value | R2    | p-Value |
| CK vs EM-3     | 0.290 | 0.022*  | 0.335 | 0.015*  | 0.361 | 0.007** |
| CK vs EM-8     | 0.474 | 0.003** | 0.381 | 0.013*  | 0.421 | 0.012*  |
| CK vs EM-15    | 0.493 | 0.008** | 0.291 | 0.009** | 0.375 | 0.007** |
| CK vs EM-20    | 0.349 | 0.008** | 0.411 | 0.006** | 0.462 | 0.010*  |
| CK vs IM-3     | 0.423 | 0.007** | 0.310 | 0.011*  | 0.394 | 0.007** |
| CK vs IM-8     | 0.486 | 0.010*  | 0.386 | 0.008** | 0.614 | 0.010*  |
| CK vs IM-15    | 0.451 | 0.011*  | 0.49  | 0.011*  | 0.584 | 0.009** |
| CK vs IM-20    | 0.499 | 0.010*  | 0.598 | 0.009** | 0.439 | 0.008** |
| EM-3 vs EM-8   | 0.107 | 0.360   | 0.211 | 0.008** | 0.322 | 0.006** |
| EM-3 vs EM-15  | 0.376 | 0.018*  | 0.249 | 0.020*  | 0.374 | 0.006** |
| EM-3 vs EM-20  | 0.061 | 0.843   | 0.342 | 0.008** | 0.350 | 0.007** |
| EM-3 vs IM-3   | 0.147 | 0.228   | 0.241 | 0.010*  | 0.335 | 0.008** |
| EM-3 vs IM-8   | 0.243 | 0.067   | 0.284 | 0.007** | 0.525 | 0.015*  |
| EM-3 vs IM-15  | 0.147 | 0.266   | 0.402 | 0.007** | 0.489 | 0.010*  |
| EM-3 vs IM-20  | 0.321 | 0.036*  | 0.500 | 0.008** | 0.496 | 0.006** |
| EM-8 vs EM-15  | 0.413 | 0.017*  | 0.297 | 0.014*  | 0.315 | 0.009** |
| EM-8 vs EM-20  | 0.065 | 0.589   | 0.349 | 0.015*  | 0.160 | 0.155   |
| EM-8 vs IM-3   | 0.070 | 0.518   | 0.26  | 0.011*  | 0.414 | 0.007** |
| EM-8 vs IM-8   | 0.588 | 0.021*  | 0.235 | 0.017*  | 0.508 | 0.005** |
| EM-8 vs IM-15  | 0.282 | 0.129   | 0.349 | 0.01*   | 0.496 | 0.007** |
| EM-8 vs IM-20  | 0.507 | 0.024*  | 0.493 | 0.010*  | 0.485 | 0.007** |
| EM-15 vs EM-20 | 0.310 | 0.078   | 0.249 | 0.013*  | 0.313 | 0.019*  |
| EM-15 vs IM-3  | 0.138 | 0.274   | 0.245 | 0.017*  | 0.416 | 0.007** |
| EM-15 vs IM-8  | 0.717 | 0.007** | 0.364 | 0.011*  | 0.527 | 0.008** |
| EM-15 vs IM-15 | 0.604 | 0.011*  | 0.406 | 0.007** | 0.470 | 0.004** |
| EM-15 vs IM-20 | 0.682 | 0.010*  | 0.429 | 0.010*  | 0.398 | 0.005** |
| EM-20 vs IM-3  | 0.081 | 0.425   | 0.218 | 0.034*  | 0.454 | 0.012*  |
| EM-20 vs IM-8  | 0.294 | 0.039*  | 0.377 | 0.007** | 0.594 | 0.008** |
| EM-20 vs IM-15 | 0.161 | 0.235   | 0.401 | 0.008** | 0.566 | 0.006** |
| EM-20 vs IM-20 | 0.357 | 0.035*  | 0.304 | 0.008** | 0.533 | 0.006** |
| IM-3 vs IM-8   | 0.370 | 0.055   | 0.226 | 0.025*  | 0.389 | 0.010*  |
| IM-3 vs IM-15  | 0.239 | 0.130   | 0.308 | 0.007** | 0.424 | 0.016*  |
| IM-3 vs IM-20  | 0.392 | 0.057   | 0.333 | 0.008** | 0.283 | 0.019*  |
| IM-8 vs IM-15  | 0.099 | 0.374   | 0.207 | 0.031*  | 0.247 | 0.043*  |
| IM-8 vs IM-20  | 0.090 | 0.370   | 0.528 | 0.009** | 0.491 | 0.014*  |
| IM-15 vs IM-20 | 0.183 | 0.243   | 0.457 | 0.017*  | 0.495 | 0.006** |

Note: \*, correlation is significant at the 0.05 level; \*\*, correlation is significant at the 0.01 level.
